# Supplementary material
Source: PubMed Central journal article supplement (PMC3852618)
Supplement: Supp_Table1.pdf [file Supp_Table1.pdf]

SUPPLEMENTARY TABLE S1. PRIMERS USED FOR SITE-DIRECTED MUTAGENESIS

| <i>Primer</i>             | <i>Sequence</i>                                          |
|---------------------------|----------------------------------------------------------|
| GGT2 Kozak-F              | 5'-GGGCCCGGGATCTGAGCCACCATGAAGAAGAAGTAAG-3'              |
| GGT2 Kozak-R              | 5'-CTTACTTCTTCTTCATGGTGGCTCAGATCCCGGGCCC-3'              |
| GGT2(Δ404-414)-F          | 5'-GCACCATCAACCTCTACGGGATCCTGTTC-3'                      |
| GGT2(Δ404-414)-R          | 5'-GAACAGGATCCCGTAGAGGTTGATGGTGC-3'                      |
| GGT1(C192W;E193Y)-F       | 5'-GCAGCAGCCTGTCTTGTGGTATGTGTTCTGCCGGG-3'                |
| GGT1(C192W;E193Y)-R       | 5'-CCCGGCAGAACACATACCACAAGACAGGCTGCTGC-3'                |
| GGT1(C192_E193insPLCPG)-F | 5'-AGCCTGTCTTGTGCCCCCTCTGCCCGGTGAGGTGTTCTGCCG-3'         |
| GGT1(C192_E193insPLCPG)-R | 5'-CGGCAGAACACCTCACCGGGGCAGAGGGGGCACAAGACAGGCT-3'        |
| GGT2(W192C;Y193E)-F       | 5'-GCAGCAGCCTGTCTTGTGTGAGGTGTTCTGCCGGG-3'                |
| GGT2(W192C;Y193E)-R       | 5'-CCCGGCAGAACACCTCACACAAGACAGGCTGCTGC-3'                |
| GGT2(T422D;T423D)-F       | 5'-CCCGGTCAGTGGGATCCTGTTCAATAATGAATGGGACGACTCAGCTCTCC-3' |
| GGT2(T422D;T423D)-R       | 5'-GGAGAGCTGAGTCGTCCCATTATTGAACAGGATCCCACTGACCGGG-3'     |
| GGT2(L451S)-F             | 5'-GGGAAGCAGCCGCTCTCGTCCATGTGCC-3'                       |
| GGT2(L451S)-R             | 5'-GGCACATGGACGAGAGCGGCTGCTTCCC-3'                       |
