# Supplementary material
Source: PubMed Central journal article supplement (PMC3852618)
Supplement: Supp_Table2.pdf [file Supp_Table2.pdf]

SUPPLEMENTARY TABLE S2. PRIMERS USED FOR REVERSE  
TRANSCRIPTION-POLYMERASE CHAIN REACTION

| <i>Primer</i>    | <i>Sequence</i>              |
|------------------|------------------------------|
| GGT1/GGT2-F      | 5'-GAGCAGAAGGGCCTGACGTA-3'   |
| GGT1/GGT2-R      | 5'-CGTGTAGAACTCGGGCTTGT-3'   |
| $\beta$ -actin-F | 5'-TGTGATGGTGGGAATGGGTCAG-3' |
| $\beta$ -actin-R | 5'-TTTGATGTCACGCACGATTCC-3'  |
